# Supplementary material
Source: HighWire-hosted journal article supplement (https://oem.bmj.com/highwire/filestream/157558/field_highwire_adjunct_files/0/OEM_Supplemental_052506.docx)
Supplement: OEM_Supplemental_052506.docx [file OEM_Supplemental_052506.docx]

**Online data supplement**

**Table S1 Agreement between women’s report on their partners’ occupation and partners’ self-report on their occupation by home ownership status**

| Agreement % (n) | | | | | | |
| --- | --- | --- | --- | --- | --- | --- |
| Total at 8mth | Automatic CASCOT codes | | | Semi-automatic CASCOT codes | | |
| 4-digit | 3-digit | 2-digit | 4-digit | 3-digit | 2-digit |
| Owned/mortgaged/  privately rented  n 5336 | 64.9 (3465) | 70.9 (3782) | 76.5 (4080) | 72.6 (3862) | 78.0 (4148) | 82.5 (4391) |
| Council/HA rented  n 554 | 69.9 (387) | 74.9 (415) | 80.3 (445) | 76.6 (422) | 81.9 (451) | 86.4 (476) |
| χ2 (*p-value*) for difference | 5.367 *(0.021)* | 3.985 *(0.045)* | 4.207 *(0.040)* | 4.038 *(0.044)* | 4.432 *(0.035)* | 5.223 *(0.022)* |

**Table S2 Agreement between women’s report on their partners’ occupation and partners’ self-report on their occupation by women's educational level**

| Agreement % (n) | | | | | | |
| --- | --- | --- | --- | --- | --- | --- |
| Total at 8mth | Automatic CASCOT codes | | | Semi-automatic CASCOT codes | | |
| 4-digit | 3-digit | 2-digit | 4-digit | 3-digit | 2-digit |
| Higher (degree) n 1012 | 64.1 (649) | 72.7 (736) | 77.2 (781) | 72.3 (727) | 80.3 (808) | 84.5 (850) |
| Secondary/vocational n 4876 | 65.6 (3199) | 70.9 (3457) | 76.7 (3741) | 72.9 (3546) | 77.7 (3780) | 82.4 (4006) |
| χ2 (*p-value*) for difference | 0.807 *(0.369)* | 1.368 (*0.242*) | 0.096 (*0.757*) | 0.179 (0.672) | 3.273 (0.070) | 2.613 (*0.106*) |
